# Supplementary material for: Hemodialysis-Associated Immune Dysregulation in SARS-CoV-2-Infected End-Stage Renal Disease Patients
Source: MDPI journal article supplement (doi:10.3390/ijms24021712), 2023-01-15
Supplement: s1 [file s1]

Supplementary tables:

Table S1. Characteristics of HD patients with COVID-19.

| Patient | Age | Sex    | Comorbidities                        | Cause of end-stage renal disease | HD time, month | Hospitalization <sup>a</sup> | Baseline Chest X-Ray <sup>b</sup> | PSO, days <sup>c</sup> | Worsening COVID-19 symptom after HD | Fever <sup>d</sup> | Diarrhea <sup>d</sup> | Asthenia <sup>d</sup> | Myalgia <sup>d</sup> | Dyspnea <sup>d</sup> | O <sub>2</sub> Saturation <sup>e</sup> | Exitus |
|---------|-----|--------|--------------------------------------|----------------------------------|----------------|------------------------------|-----------------------------------|------------------------|-------------------------------------|--------------------|-----------------------|-----------------------|----------------------|----------------------|----------------------------------------|--------|
| P1      | 89  | Male   | Obesity, AH, DM, IHD<br>Dyslipidemia | Diabetic nephropathy             | 25             | YES                          | BI, AC                            | 6                      | NO                                  | YES                | NO                    | YES                   | NO                   | NO                   | 98                                     | YES    |
| P1*     | 89  | Male   | Obesity AH DM, IHD,<br>Dyslipidemia  | Diabetic nephropathy             | 25             | YES                          | BI, AC                            | 14                     | YES                                 | NO                 | NO                    | YES                   | NO                   | YES                  | 96                                     | YES    |
| P2      | 65  | Male   | AH, DM IHD, Dyslipidemia             | Diabetic nephropathy             | 44             | YES                          | GGO                               | 3                      | NO                                  | YES                | NO                    | NO                    | NO                   | NO                   | 98                                     | YES    |
| P3      | 48  | Male   | N/A                                  | Hydronephrosis                   | 53             | NO                           | N/A                               | 5                      | NO                                  | NO                 | NO                    | NO                    | NO                   | NO                   | 100                                    | NO     |
| P4      | 55  | Female | AH, IHD                              | Hypertensive nephrosclerosis     | 44             | YES                          | GGO, AC                           | 9                      | NO                                  | YES                | NO                    | YES                   | YES                  | YES                  | 95                                     | NO     |
| P5      | 52  | Male   | AH                                   | IgA nephropathy                  | 31             | YES                          | N/A                               | 46                     | YES                                 | YES                | YES                   | NO                    | YES                  | NO                   | 98                                     | NO     |
| P6      | 34  | Female | AH                                   | Hemolytic-uraemic syndrome       | 45             | YES                          | N/A                               | 19                     | NO                                  | YES                | NO                    | NO                    | NO                   | NO                   | 100                                    | NO     |
| P7      | 47  | Male   | AH, DM                               | IgA nephropathy                  | 80             | YES                          | GGO                               | 13                     | YES                                 | YES                | NO                    | NO                    | NO                   | NO                   | 100                                    | NO     |
| P8      | 84  | Male   | AH                                   | Hypertensive nephrosclerosis     | 18             | NO                           | N/A                               | 11                     | NO                                  | NO                 | NO                    | NO                    | NO                   | NO                   | 100                                    | NO     |

\*Two independent samples were obtained from P1 at different COVID-19 evolution time points (P1and P1\*); <sup>a</sup>Hospitalization due to COVID-19 disease; <sup>b</sup>Baseline Chest X-Ray at COVID-19 diagnosis; <sup>c</sup>Duration of symptoms from diagnosis by positive PCR to sample collection day; <sup>d</sup>Symptoms at debut of COVID-19 disease; <sup>e</sup>O<sub>2</sub> saturation measurement on sample collection day.  
AC: Alveolar consolidation; AH: Arterial hypertension; BI: Bilateral infiltrates; DM: Diabetes mellitus; GGO: Ground-glass opacification; HD: hemodialysis; IHD: Ischemic heart disease; N/A: not applicable; PSO: Post-symptoms onset.

**Table S2.** Monoclonal antibodies for T subsets and monocytes analysis.

| Marker                            | Fluorochrome      | Vendor          |
|-----------------------------------|-------------------|-----------------|
| CD3                               | PerCP-Cy5.5       | BD Bioscience   |
| CD4                               | APC-AlexaFluor750 | Beckman Coulter |
| CD8                               | APC               | BD Bioscience   |
| HLA-DR                            | Pacific Blue      | Beckman Coulter |
| CCR7                              | FITC              | BD Bioscience   |
| CD45RA                            | PCy7              | BD Bioscience   |
| CD3                               | V450              | BD Bioscience   |
| CD19                              | V450              | BD Bioscience   |
| CD56                              | V450              | BD Bioscience   |
| CD14                              | FITC              | BD Bioscience   |
| CD33                              | PCy7              | eBioscience     |
| HLA-DR                            | APC               | BD Bioscience   |
| CD16                              | V500              | BD Bioscience   |
| CCR2                              | PE                | BD Bioscience   |
| CCR5                              | APC-Cy7           | BD Bioscience   |
| CD86                              | PerCP-Cy5.5       | BD Bioscience   |
| BD Multitest 6-color TBNK reagent |                   | BD Bioscience   |

Supplementary figures:

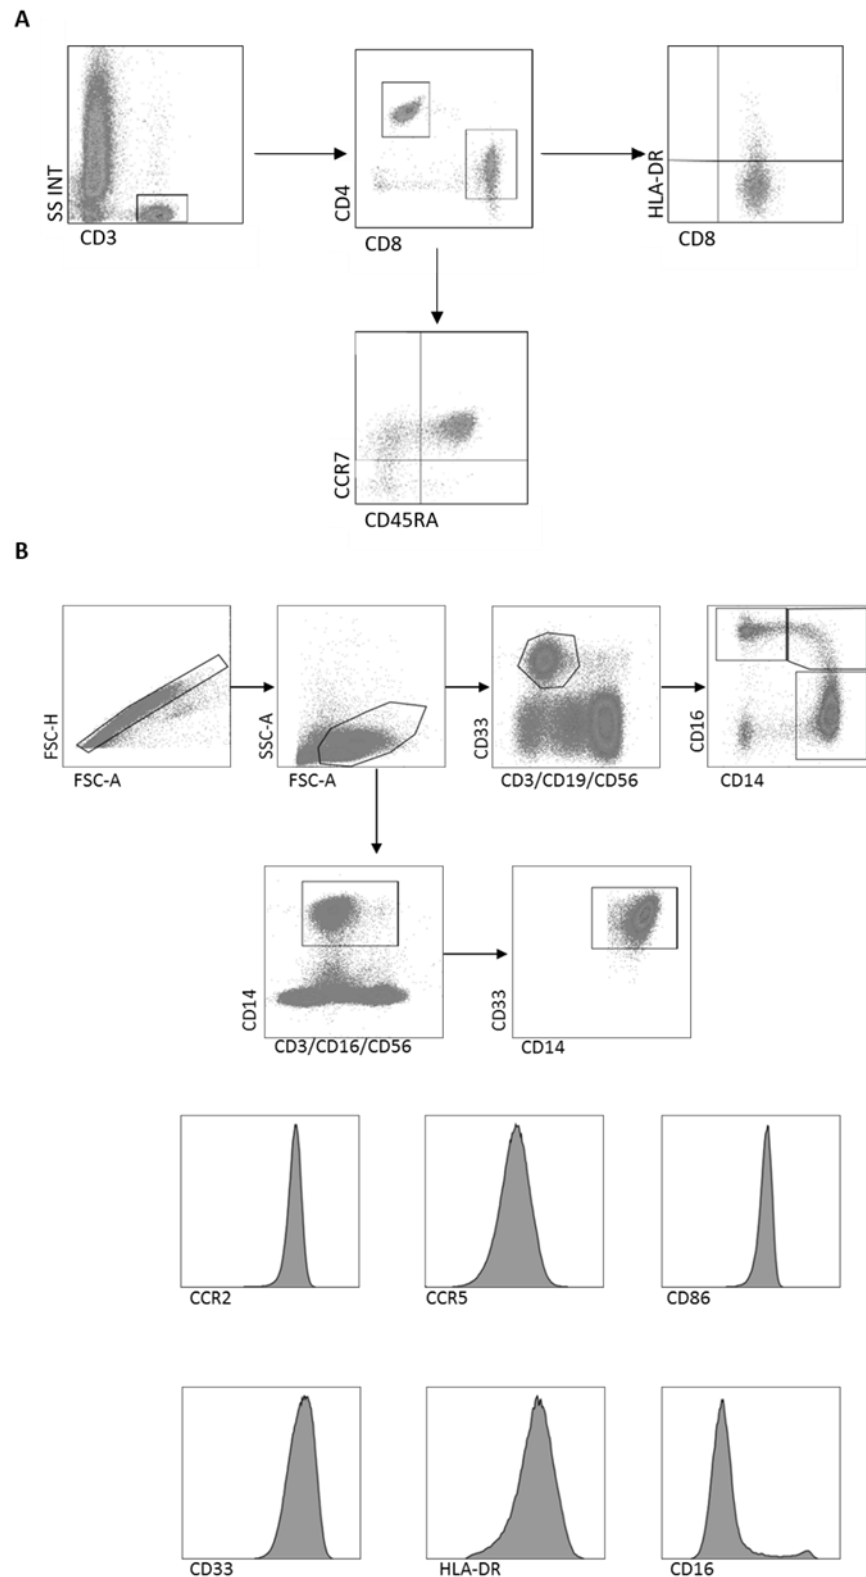

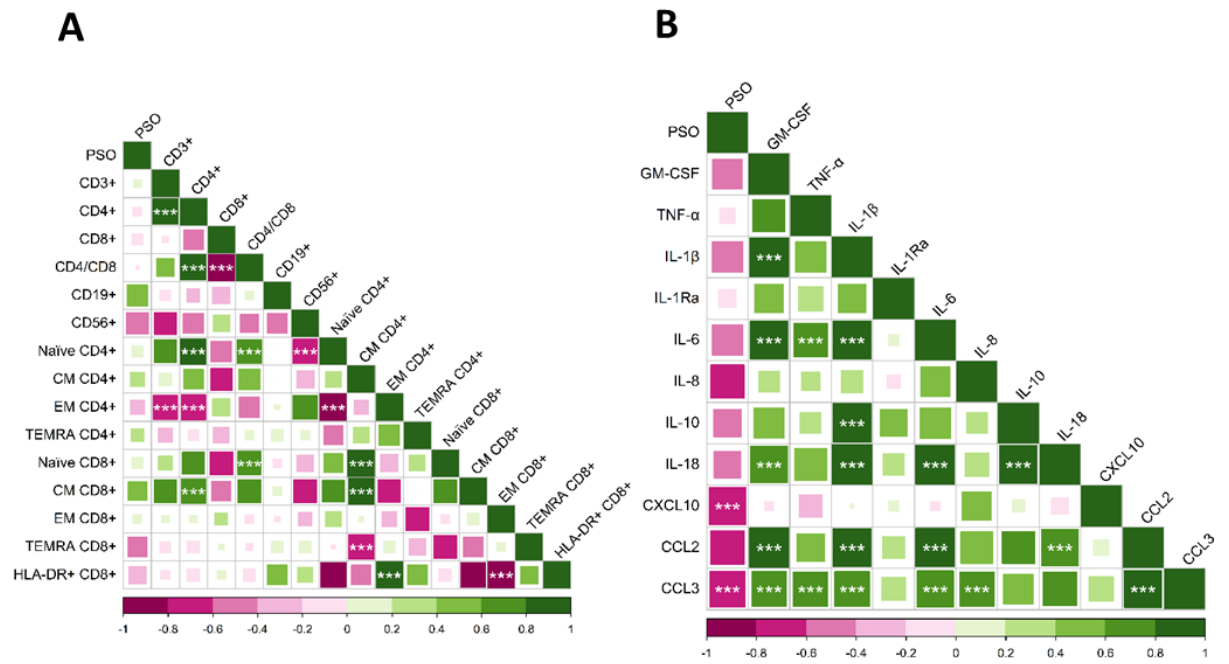

**Figure S2. Correlation between cell populations or *in vitro* cytokines and days post symptom onset (PSO) in HD + COVID-19 patients.** (A) Correlation plot between days PSO and subsets of CD4<sup>+</sup>CD8<sup>+</sup> T, B and NK cells in HD + COVID-19 patients. (B) Correlation plot between days PSO and cytokine levels produced by monocyte culture upon LPS stimulation in HD + COVID-19 patients. Positive correlations appear in green, and negative correlations appear in pink. The size and the color gradient of the circle corresponds to the magnitude of the correlation. Linear regressions were performed using Spearman's rank test, \*,  $p < 0.05$ ; \*\*,  $p < 0.01$ ; \*\*\*,  $p < 0.001$ .

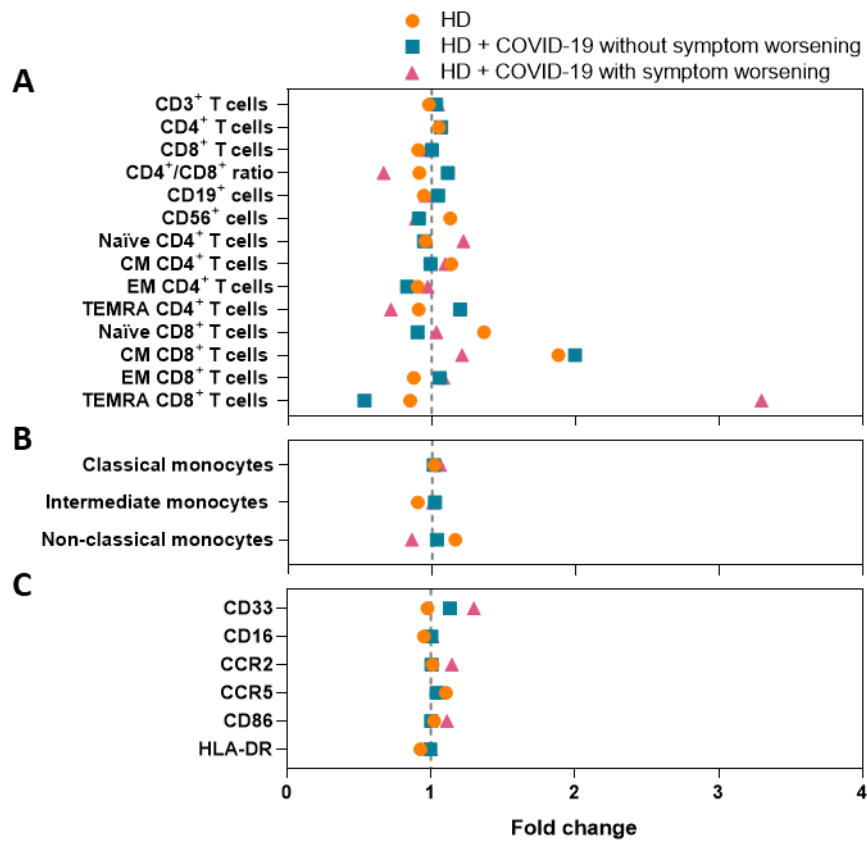

**Figure S3. Change in lymphocyte and monocyte subsets after hemodialysis** (A) Fold change of distribution of CD4<sup>+</sup> T, CD8<sup>+</sup> T, NK and B cells and their subsets (naïve, CM, EM and TEMRA) between uninfected HD patients, and HD + COVID-19 patients with or without clinical worsening after HD. (B) Fold change of classical (CD14<sup>+</sup>CD16<sup>-</sup>), intermediate (CD14<sup>+</sup>CD16<sup>+</sup>) and non-classical (CD14<sup>-</sup>CD16<sup>+</sup>) monocytes. (C) Fold change of surface markers on CD14<sup>+</sup> monocytes. Mean fold change is represented for each patient cohort. Dotted line indicates no change between the pre and post HD sample. All p values are non-significant, ns.
